# Supplementary material for: High tempo music prolongs high intensity exercise
Source: PeerJ. 2019 Jan 8;6:e6164. doi: 10.7717/peerj.6164 (PMC6329333; doi:10.7717/peerj.6164)
Supplement: Supplemental Information 1 [file peerj-07-6164-s001.xlsx]

## Sheet: Group data
1= male					IT #1 - With Music										IT#2 - Without Music
Gender	DOB	Height (cm)	Weight (kg)	VO2 (L/min)	# of Intervals	TTF (min)	TTF (sec)	TTF (No Rest)	TTF (No Rest)	Pre BL	Post BL	5 Post BL	Final RPE	Reason End	# of Intervals	TTF (min)	TTF (sec)	TTF (No Rest)	TTF (No Rest)	Pre BL	Post BL	5 Min Post BL	Final RPE
2	04/25/1983	177.5	87.85	3.8	1.75	09:04:00	544	07:04:00	424	1.8	10.1	6.1	19	RPE	1.5	08:02:00	482	06:02:00	362	1.7	13.4	10.3	19
1	1985-07-06	166.1	68.8	3	3.75	21:02:00	1262	15:02:00	902	2.1	13.7	7	19	RPE	2.75	15:53:00	953	11:53:00	713	1	10	5.7	19
2	01/21/1988	173	76.35	3.7	3.25	19:04:00	1144	13:04:00	784	3.9	13.6	10.8	19	RPE	3.25	19:22:00	1162	13:22:00	802	1.4	17.2	9.3	18
2	1985-01-12	178.2	73.1	3.5	2	10:02:00	602	8	480	1	12.8	10.9	18	↓60	2	10:04:00	604	8	480	1.3	13.3	12	19
1	1988-04-10	161.9	69.1	3	2	10:10:00	610	8	480	1.6	15.9	9.6	19	RPE	1.5	07:57:00	477	05:57:00	357	2.1	8.9	4.3	18
1	02/21/1992	159.9	55.8	2.6	2.5	14:05:00	845	10:05:00	605	1.6	13	11.3	19	RPE	2.75	15:01:00	901	11:01:00	661	1.1	13.7	11.3	17
1	1992-09-05	158	68.2	3.3	2.5	13:53:00	833	09:53:00	593	1.6	17	4.3	19	RPE	1.75	09:05:00	545	07:05:00	425	2.9	10	14.9	19
1	08/23/1988	163.6	70.05	2.8	1.75	09:04:00	544	07:04:00	424	2.3	11.9	19.7	18	VF	2	10:03:00	603	8	480	1.4	12.9	10.8	19
2	04/13/1992	190.5	75.05	4.6	2.25	12:51:00	771	08:51:00	531	1.6	10.8	5.1	17	VF	1.75	08:26:00	506	06:26:00	386	0.9	9.1	9.3	18
2	1983-12-09	179.6	81.75	4.5	4	22:03:00	1323	16	960	1.6	9.8	6.3	19	RPE	3.75	20:01:00	1201	14:01:00	841	1.9	7.8	3.9	19
2	1990-05-04	177.6	64.4	4.5	3	16:25:00	985	12	720	4.9	14.1	6.7	14	VF	2	11:14:00	674	8	480	1.1	11.8	8.7	16
2	08/30/1990	180.7	67.5	4.2	1.25	06:48:00	408	04:48:00	288	1.4	11	6.8	17	↓60	0.75	03:25:00	205	03:25:00	205	2.6	10.4	9.3	19
1	1985-07-08	172.1	65.1	3.6	2	10:03:00	603	8	480	0.9	12.3	10.3	19	RPE	2	10:02:00	602	8	480	2.3	12.7	11.9	19
2	09/26/1989	169.1	75.25	4.2	4	23:18:00	1398	16	960	1.1	20.4	10.2	18	VF	4	22:08:00	1328	16	960	2.1	19.1	10.6	19
1	1990-01-10	172.5	67.35	2.7	2.25	13:03:00	783	09:03:00	543	1.6	14	11.1	19	RPE	2.75	15:03:00	903	11:03:00	663	2.2	10.1	5.9	19
1	04/29/1992	165.5	62.85	2.7	3	16:00:00	960	12	720	1.6	15.2	15.7	17	VF	2.75	15:04:00	904	11:04:00	664	1.7	11.8	15.6	17

## Sheet: Metabolic data
Gender	Condition	Time	BF	RER	VO2 (STPD)	Ventilation	VCO2 (STPD)	Tidal Volume
M	Music	2.5	30.93	0.831	2.556	71.077	2.658	2.298
M	Music	5	37.5	0.896	2.888	89.175	2.907	2.378
M	Music	7.5	41.67	0.95	2.841	84.548	2.59	2.029
M	Music	100	51.72	1.035	3.539	132.61	3.663	2.564
F	Music	2.5	42.86	0.9	2.584	78.52	2.467	1.832
F	Music	5	48.39	0.924	2.998	92.957	2.77	1.921
F	Music	7.5	48.39	0.951	2.83	90.634	2.55	1.873
F	Music	100	25.42	0.99	2.058	63.372	1.882	2.493
M	Music	2.5	28.3	0.88	3.752	74.684	3.782	2.639
M	Music	5	36.14	0.989	3.575	91.615	3.536	2.535
M	Music	7.5	50	0.904	3.645	100.4	3.294	2.008
M	Music	100	49.18	0.98	3.445	88.672	2.958	1.803
M	Music	2.5	35.29	0.924	2.633	72.344	2.697	2.05
M	Music	5	46.15	0.98	2.938	100.607	3.173	2.18
M	Music	7.5	48.39	0.979	3.044	100.216	2.98	2.071
M	Music	100	66.67	1.059	3.524	159.741	3.733	2.396
F	Music	2.5	32.26	0.89	2.081	60.842	2.071	1.886
F	Music	5	40.54	0.92	2.342	75.404	2.315	1.86
F	Music	7.5	47.62	0.91	2.22	74.097	2	1.556
F	Music	100	52.63	0.99	2.326	87.945	2.165	1.671
F	Music	2.5	46.88	0.87	2.065	71.726	2.1	1.53
F	Music	5	54.55	0.961	2.086	83.898	2.213	1.538
F	Music	7.5	60	0.937	2.135	83.4	2	1.39
F	Music	100	68.18	0.97	2.329	98.861	2.216	1.45
F	Music	2.5	40.54	0.863	2.451	63.405	2.361	1.564
F	Music	5	36.59	0.831	2.07	53.495	1.721	1.462
F	Music	7.5	48.39	0.896	2.706	77.569	2.424	1.603
F	Music	100	34.09	0.95	1.548	43.908	1.293	1.288
F	Music	2.5	40	0.88	2.257	79.56	2.456	1.989
F	Music	5	55.56	0.99	2.69	100.841	2.79	1.815
F	Music	7.5	49.18	0.987	2.405	99.491	2.373	2.023
F	Music	100	58.82	1.07	2.464	102.053	2.358	1.735
M	Music	2.5	34.09	0.869	3.451	94.122	3.345	2.761
M	Music	5	37.5	0.915	2.68	72.975	2.183	1.946
M	Music	7.5	50.85	0.926	3.464	114.819	3.208	2.258
M	Music	100	50	0.951	3.049	100.9	2.593	2.018
M	Music	2.5	33.33	0.904	3.501	84.258	3.164	2.528
M	Music	5	41.1	1.008	3.641	112.039	3.672	2.726
M	Music	7.5	42.86	0.921	3.883	113.836	3.576	2.656
M	Music	100	48.39	0.944	3.821	123.201	3.608	2.546
M	Music	2.5	37.97	0.92	4.104	129.478	4.11	3.41
M	Music	5	53.57	0.857	4.063	111.104	3.482	2.074
M	Music	7.5	55.56	0.892	3.557	97.508	2.818	1.755
M	Music	100	42.86	0.99	3.709	123.737	3.45	2.887
M	Music	2.5	34.48	0.882	2.837	65.512	2.503	1.9
M	Music	5	43.48	1.178	2.821	92.047	3.322	2.117
M	Music	7.5	45.45	1.098	2.663	88.446	2.923	1.946
M	Music	100	36.59	0.895	2.043	52.36	1.828	1.431
F	Music	2.5	33.71	0.969	2.167	58.959	2.1	1.749
F	Music	5	44.78	1.023	2.575	86.112	2.634	1.923
F	Music	7.5	43.48	0.883	2.827	87.786	2.497	2.019
F	Music	100	53.57	0.924	2.975	99.694	2.749	1.861
M	Music	2.5	38.46	0.952	3.432	84.227	3.267	2.19
M	Music	5	40.54	0.935	3.686	104.026	3.447	2.566
M	Music	7.5	46.88	0.967	3.403	114.575	3.293	2.444
M	Music	100	26.09	1.05	2.24	47.562	1.916	1.823
F	Music	2.5	22.22	0.969	2.216	44.24	2.146	1.991
F	Music	5	28.57	0.94	2.322	57.883	2.412	2.026
F	Music	7.5	43.48	0.9	3.06	74.655	2.755	1.717
F	Music	100	56.6	1.007	2.586	90.843	2.604	1.605
F	Music	2.5	36.14	0.84	2.149	66.823	2.155	1.849
F	Music	5	37.97	0.912	2.067	67.663	1.885	1.782
F	Music	7.5	30.3	0.838	2.104	62.842	1.763	2.074
F	Music	100	42.86	0.936	2.241	88.977	2.097	2.076
M	No Music	2.5	29.41	0.89	2.583	64.702	2.564	2.2
M	No Music	5	37.5	0.9	2.986	89.887	3.163	2.397
M	No Music	7.5	35.29	0.881	2.67	76.297	2.351	2.162
M	No Music	100	57.69	0.93	3.408	127.956	3.169	2.218
F	No Music	2.5	32.26	0.9	2.602	74.359	2.594	2.305
F	No Music	5	37.5	0.891	2.675	76.463	2.384	2.039
F	No Music	7.5	42.86	0.803	2.584	75.348	2.076	1.758
F	No Music	100	30.61	0.893	2.172	72.546	1.939	2.37
M	No Music	2.5	37.97	0.9	3.85	89.951	3.93	2.369
M	No Music	5	41.67	0.89	4.177	106.3	3.716	2.551
M	No Music	7.5	40	0.873	3.45	91.36	3.011	2.284
M	No Music	100	50.85	0.852	3.836	108.819	3.27	2.14
M	No Music	2.5	22.9	0.9	2.732	74.311	2.858	3.245
M	No Music	5	23.26	0.93	2.144	52.242	2.142	2.246
M	No Music	7.5	45.45	0.986	3.232	107.217	3.187	2.359
M	No Music	100	51.72	0.942	3.648	134.782	3.436	2.606
F	No Music	2.5	32.61	0.84	1.934	53.154	1.825	1.63
F	No Music	5	32.97	0.971	2.303	67.49	2.237	2.047
F	No Music	7.5	26.09	0.9	1.857	60.268	1.521	2.31
F	No Music	100	28.57	0.89	2.349	60.768	1.91	2.127
F	No Music	2.5	51.72	0.8	2.053	78.045	2.28	1.509
F	No Music	5	53.57	0.971	2.113	81.426	2.051	1.52
F	No Music	7.5	51.72	0.883	1.792	72.046	1.582	1.393
F	No Music	100	38.46	0.957	2.237	80.074	2.142	2.082
F	No Music	2.5	34.88	0.887	1.681	35.264	1.491	1.011
F	No Music	5	34.88	0.969	1.831	43.46	1.773	1.246
F	No Music	7.5	37.5	0.821	2.37	54.6	1.946	1.456
F	No Music	100	38.96	0.928	2.623	71.959	2.434	1.847
F	No Music	2.5	38.96	0.93	2.615	78.154	2.693	2.006
F	No Music	5	46.88	0.87	2.689	90.994	2.763	1.941
F	No Music	7.5	56.6	0.922	2.628	98.654	2.422	1.743
F	No Music	100	57.69	0.938	2.765	110.534	2.593	1.916
M	No Music	2.5	32.61	0.89	5.421	95.678	3.78	2.934
M	No Music	5	29.41	0.994	3.439	97.965	3.42	3.331
M	No Music	7.5	41.1	0.854	3.293	90.543	2.811	2.203
M	No Music	100	42.86	0.892	3.716	113.536	3.315	2.649
M	No Music	2.5	29.41	0.966	3.2	76.084	3.093	2.587
M	No Music	5	32.61	0.896	3.229	76.862	2.894	2.357
M	No Music	7.5	29.7	0.816	3.128	71.577	2.552	2.41
M	No Music	100	34.48	0.902	3.474	92.234	3.134	2.675
M	No Music	2.5	40.54	0.915	3.672	89.553	3.36	2.209
M	No Music	5	48.39	0.91	3.792	103.748	3.453	2.144
M	No Music	7.5	49.18	0.888	3.674	102.491	3.263	2.084
M	No Music	100	49.18	0.873	2.901	79.77	2.531	1.622
M	No Music	2.5	37.97	0.9	3.024	70.396	2.721	1.854
M	No Music	5	38.46	0.94	2.83	81.958	2.967	2.131
M	No Music	7.5	39.47	0.99	3.156	95.36	3.569	2.416
M	No Music	100	46.88	1.098	3.192	107.449	3.503	2.292
F	No Music	2.5	35.71	0.94	2.52	75.777	2.782	2.122
F	No Music	5	27.27	0.97	1.98	60.976	2.167	2.236
F	No Music	7.5	38.96	0.959	2.598	82.439	2.492	2.116
F	No Music	100	49.18	0.938	2.809	92.753	2.635	1.886
M	No Music	2.5	33.33	0.97	3.127	87.125	3.149	2.614
M	No Music	5	43.48	0.902	4.385	118.222	3.953	2.719
M	No Music	7.5	50.85	0.839	4.194	126.311	3.519	2.484
M	No Music	100	51.72	0.774	4.118	107.009	3.189	2.069
F	No Music	2.5	25.21	0.962	2.303	49.033	2.216	1.945
F	No Music	5	32.26	0.872	2.339	60.165	2.039	1.865
F	No Music	7.5	25.21	0.872	1.936	47.748	1.689	1.894
F	No Music	100	27.78	0.967	1.998	61.616	1.933	2.218
F	No Music	2.5	30.61	0.985	2.463	72.087	2.425	2.355
F	No Music	5	35.71	0.875	2.629	73.884	2.3	2.069
F	No Music	7.5	33.33	0.782	2.303	59.427	1.801	1.783
F	No Music	100	36.14	0.881	2.551	76.87	2.248	2.127

## Sheet: BF
							Music					NO Music
						1= male	BF 25	BF 50	BF 75	BF 100		BF 25	BF 50	BF 75	BF 100
						1	30.93	37.5	41.67	51.72		29.41	37.5	35.29	57.69
						2	42.86	48.39	48.39	25.42		32.26	37.5	42.86	30.61
						1	28.3	36.14	50	49.18		37.97	41.67	40	50.85
						1	35.29	46.15	48.39	66.67		22.9	23.26	45.45	51.72
						2	32.26	40.54	47.62	52.63		32.61	32.97	26.09	28.57
						2	46.88	54.55	60	68.18		51.72	53.57	51.72	38.46
						2	40.54	36.59	48.39	34.09		34.88	34.88	37.5	38.96
						2	40	55.56	49.18	58.82		38.96	46.88	56.6	57.69
						1	34.09	37.5	50.85	50		32.61	29.41	41.1	42.86
						1	33.33	41.1	42.86	48.39		29.41	32.61	29.7	34.48
						1	37.97	53.57	55.56	42.86		40.54	48.39	49.18	49.18
						1	34.48	43.48	45.45	36.59		37.97	38.46	39.47	46.88
						2	33.71	44.78	43.48	53.57		35.71	27.27	38.96	49.18
						1	38.46	40.54	46.88	26.09		33.33	43.48	50.85	51.72
						2	22.22	28.57	43.48	56.6		25.21	32.26	25.21	27.78
						2	36.14	37.97	30.3	42.86		30.61	35.71	33.33	36.14
						M
						M
						F
						F
						F
						F
						M
						M
						M
						M
						F
						M
						F
						F

## Sheet: RER
							Music					NO Music
						1= male	RER 25	RER 50	RER 75	RER 100		RER 25	RER 50	RER 75	RER 100
						1	0.831	0.896	0.95	1.035		0.89	0.9	0.881	0.93
						2	0.9	0.924	0.951	0.99		0.9	0.891	0.803	0.893
						1	0.88	0.989	0.904	0.98		0.9	0.89	0.873	0.852
						1	0.924	0.98	0.979	1.059		0.9	0.93	0.986	0.942
						2	0.89	0.92	0.91	0.99		0.84	0.971	0.9	0.89
						2	0.87	0.961	0.937	0.97		0.8	0.971	0.883	0.957
						2	0.863	0.831	0.896	0.95		0.887	0.969	0.821	0.928
						2	0.88	0.99	0.987	1.07		0.93	0.87	0.922	0.938
						1	0.869	0.915	0.926	0.951		0.89	0.994	0.854	0.892
						1	0.904	1.008	0.921	0.944		0.966	0.896	0.816	0.902
						1	0.92	0.857	0.892	0.99		0.915	0.91	0.888	0.873
						1	0.882	1.178	1.098	0.895		0.9	0.94	0.99	1.098
						2	0.969	1.023	0.883	0.924		0.94	0.97	0.959	0.938
						1	0.952	0.935	0.967	1.05		0.97	0.902	0.839	0.774
						2	0.969	0.94	0.9	1.007		0.962	0.872	0.872	0.967
						2	0.84	0.912	0.838	0.936		0.985	0.875	0.782	0.881

## Sheet: VO2
								Music					NO Music
							1= male	RER 25	RER 50	RER 75	RER 100		RER 25	RER 50	RER 75	RER 100
							1	2.556	2.888	2.841	3.539		2.583	2.986	2.67	3.408
							2	2.584	2.998	2.83	2.058		2.602	2.675	2.584	2.172
							1	3.752	3.575	3.645	3.445		3.85	4.177	3.45	3.836
							1	2.633	2.938	3.044	3.524		2.732	2.144	3.232	3.648
							2	2.081	2.342	2.22	2.326		1.934	2.303	1.857	2.349
							2	2.065	2.086	2.135	2.329		2.053	2.113	1.792	2.237
							2	2.451	2.07	2.706	1.548		1.681	1.831	2.37	2.623
							2	2.257	2.69	2.405	2.464		2.615	2.689	2.628	2.765
							1	3.451	2.68	3.464	3.049		5.421	3.439	3.293	3.716
							1	3.501	3.641	3.883	3.821		3.2	3.229	3.128	3.474
							1	4.104	4.063	3.557	3.709		3.672	3.792	3.674	2.901
							1	2.837	2.821	2.663	2.043		3.024	2.83	3.156	3.192
							2	2.167	2.575	2.827	2.975		2.52	1.98	2.598	2.809
							1	3.432	3.686	3.403	2.24		3.127	4.385	4.194	4.118
							2	2.216	2.322	3.06	2.586		2.303	2.339	1.936	1.998
							2	2.149	2.067	2.104	2.241		2.463	2.629	2.303	2.551

## Sheet: CO2
							Music					NO Music
						1= male	RER 25	RER 50	RER 75	RER 100		RER 25	RER 50	RER 75	RER 100
						1	2.658	2.907	2.59	3.663		2.564	3.163	2.351	3.169
						2	2.467	2.77	2.55	1.882		2.594	2.384	2.076	1.939
						1	3.782	3.536	3.294	2.958		3.93	3.716	3.011	3.27
						1	2.697	3.173	2.98	3.733		2.858	2.142	3.187	3.436
						2	2.071	2.315	2	2.165		1.825	2.237	1.521	1.91
						2	2.1	2.213	2	2.216		2.28	2.051	1.582	2.142
						2	2.361	1.721	2.424	1.293		1.491	1.773	1.946	2.434
						2	2.456	2.79	2.373	2.358		2.693	2.763	2.422	2.593
						1	3.345	2.183	3.208	2.593		3.78	3.42	2.811	3.315
						1	3.164	3.672	3.576	3.608		3.093	2.894	2.552	3.134
						1	4.11	3.482	2.818	3.45		3.36	3.453	3.263	2.531
						1	2.503	3.322	2.923	1.828		2.721	2.967	3.569	3.503
						2	2.1	2.634	2.497	2.749		2.782	2.167	2.492	2.635
						1	3.267	3.447	3.293	1.916		3.149	3.953	3.519	3.189
						2	2.146	2.412	2.755	2.604		2.216	2.039	1.689	1.933
						2	2.155	1.885	1.763	2.097		2.425	2.3	1.801	2.248

## Sheet: Ventilation
							Music					NO Music
						1= male	RER 25	RER 50	RER 75	RER 100		RER 25	RER 50	RER 75	RER 100
						1	71.077	89.175	84.548	132.61		64.702	89.887	76.297	127.956
						2	78.52	92.957	90.634	63.372		74.359	76.463	75.348	72.546
						1	74.684	91.615	100.4	88.672		89.951	106.3	91.36	108.819
						1	72.344	100.607	100.216	159.741		74.311	52.242	107.217	134.782
						2	60.842	75.404	74.097	87.945		53.154	67.49	60.268	60.768
						2	71.726	83.898	83.4	98.861		78.045	81.426	72.046	80.074
						2	63.405	53.495	77.569	43.908		35.264	43.46	54.6	71.959
						2	79.56	100.841	99.491	102.053		78.154	90.994	98.654	110.534
						1	94.122	72.975	114.819	100.9		95.678	97.965	90.543	113.536
						1	84.258	112.039	113.836	123.201		76.084	76.862	71.577	92.234
						1	129.478	111.104	97.508	123.737		89.553	103.748	102.491	79.77
						1	65.512	92.047	88.446	52.36		70.396	81.958	95.36	107.449
						2	58.959	86.112	87.786	99.694		75.777	60.976	82.439	92.753
						1	84.227	104.026	114.575	47.562		87.125	118.222	126.311	107.009
						2	44.24	57.883	74.655	90.843		49.033	60.165	47.748	61.616
						2	66.823	67.663	62.842	88.977		72.087	73.884	59.427	76.87

## Sheet: Tidal Volume
							Music					NO Music
						1= male	RER 25	RER 50	RER 75	RER 100		RER 25	RER 50	RER 75	RER 100
						1	2.298	2.378	2.029	2.564		2.2	2.397	2.162	2.218
						2	1.832	1.921	1.873	2.493		2.305	2.039	1.758	2.37
						1	2.639	2.535	2.008	1.803		2.369	2.551	2.284	2.14
						1	2.05	2.18	2.071	2.396		3.245	2.246	2.359	2.606
						2	1.886	1.86	1.556	1.671		1.63	2.047	2.31	2.127
						2	1.53	1.538	1.39	1.45		1.509	1.52	1.393	2.082
						2	1.564	1.462	1.603	1.288		1.011	1.246	1.456	1.847
						2	1.989	1.815	2.023	1.735		2.006	1.941	1.743	1.916
						1	2.761	1.946	2.258	2.018		2.934	3.331	2.203	2.649
						1	2.528	2.726	2.656	2.546		2.587	2.357	2.41	2.675
						1	3.41	2.074	1.755	2.887		2.209	2.144	2.084	1.622
						1	1.9	2.117	1.946	1.431		1.854	2.131	2.416	2.292
						2	1.749	1.923	2.019	1.861		2.122	2.236	2.116	1.886
						1	2.19	2.566	2.444	1.823		2.614	2.719	2.484	2.069
						2	1.991	2.026	1.717	1.605		1.945	1.865	1.894	2.218
						2	1.849	1.782	2.074	2.076		2.355	2.069	1.783	2.127

## Sheet: RPE data
AVERAGE RPE AT EACH LEVEL
		MUSIC						NO MUSIC
Subject	Sex	Stages Completed		RPE				Stages Completed		RPE
			Baseline	0.25	0.5	0.75	TTF		Baseline	0.25	0.5	0.75	TTF
	M	7	7	13.75	14.5	16.25	19	6	9	12.5	16	17	19
	F	15	7	11.75	15.5	17.25	19	11	9	12	13.5	14.25	17
	M	13	12	14	15.5	18	19	13	11	13	14.5	16.75	18
	M	8	11	13	16	17	18	8	12	14	17	17	18
	F	8	9	14	16	17	19	6	11	13.5	15	16.5	18
	F	8	11	14	15	16	19	10	11	15.5	16	17	17
	F	10	13	16.5	16	18	19	7	11	14.75	16.5	16.5	19
	F	7	11	13	14.5	16.25	18	8	11	14	16	17	19
	M	9	11	13	15	16.75	17	7	10	12.75	15	14.75	18
	M	16	11	14	15	17	19	14	9	12.5	15	16	19
	M	12	12	13	14	14	14	8	9	12	14	15	16
	M	4	14	15	15	15	16	4	14	15	17	18	19
	F	8	11	13	16	17	19	8	10	13	17	15	19
	M	16	11	12	13	15	17	16	11	13	16	17	19
	F	8	11	14	16	17	19	11	9	13.75	16	16.5	19
	F	12	11	14	15	15	17	11	11	13	14	16.5	17
		10.0625		13.625	15.125	16.4062	18	9.25		13.3906	15.5312	16.2969	18.1875
		3.54906		1.12916	0.846562	1.14337	1.46059	3.23522		1.04071	1.13238	1.02558	0.981071
AVERAGE STAGE COMPLETED
		MUSIC						NO MUSIC
Subject	Sex	Stage Completed		Stage of percentage RPE				Stage Completed		Stage of percentage RPE
				0.25	0.5	0.75	TTF			0.25	0.5	0.75	TTF
	M	7		1.75	3.5	5.25	7	6		1.5	3	4.5	6
	F	15		3.75	7.5	11.25	15	11		2.75	5.5	8.25	11
	M	13		3.25	6.5	9.75	13	13		3.25	6.5	9.75	13
	M	8		2	4	6	8	8		2	4	6	8
	F	8		2	4	6	8	6		1.5	3	4.5	6
	F	8		2	4	6	8	10		2.5	5	7.5	10
	F	10		2.5	5	7.5	10	7		1.75	3.5	5.25	7
	F	7		1.75	3.5	5.25	7	8		2	4	6	8
	M	9		2.25	4.5	6.75	9	7		1.75	3.5	5.25	7
	M	16		4	8	12	16	14		3.5	7	10.5	14
	M	12		3	6	9	12	8		2	4	6	8
	M	4		1	2	3	4	4		1	2	3	4
	F	8		2	4	6	8	8		2	4	6	8
	M	16		4	8	12	16	16		4	8	12	16
	F	8		2	4	6	8	11		2.75	5.5	8.25	11
	F	12		3	6	9	12	11		2.75	5.5	8.25	11
		10.0625		2.51562	5.03125	7.54688	10.0625	9.25		2.3125	4.625	6.9375	9.25
		3.54906		0.887265	1.77453	2.6618	3.54906	3.23522		0.808806	1.61761	2.42642	3.23522
AVERAGE RPE AT EACH LEVEL
		MUSIC						NO MUSIC
Subject	Sex	Change in RPE						Change in RPE
		25%-baseline	50%-25%	75%-50%	100%-75%			25%-baseline	50%-25%	75%-50%	100%-75%
	M	6.75	0.75	1.75	2.75			3.5	3.5	1	2
	F	4.75	3.75	1.75	1.75			3	1.5	0.75	2.75
	M	2	1.5	2.5	1			2	1.5	2.25	1.25
	M	2	3	1	1			2	3	0	1
	F	5	2	1	2			2.5	1.5	1.5	1.5
	F	3	1	1	3			4.5	0.5	1	0
	F	3.5	-0.5	2	1			3.75	1.75	0	2.5
	F	2	1.5	1.75	1.75			3	2	1	2
	M	2	2	1.75	0.25			2.75	2.25	-0.25	3.25
	M	3	1	2	2			3.5	2.5	1	3
	M	1	1	0	0			3	2	1	1
	M	1	0	0	1			1	2	1	1
	F	2	3	1	2			3	4	-2	4
	M	1	1	2	2			2	3	1	2
	F	3	2	1	2			4.75	2.25	0.5	2.5
	F	3	1	0	2			2	1	2.5	0.5
		2.8125		1.28125	1.59375			2.89062		0.765625	1.89062	#DIV/0!	#DIV/0!
		1.58771		0.784618	0.82095			0.98306		1.03468	1.08	#DIV/0!	#DIV/0!

## Sheet: Heart rate data
1= male	Music							No Music
Gender	HR-Pre	HR-INT1	HR-INT2	HR-INT3	HR-INT4	HR-Post	HR-5Post	HR-Pre	HR-INT1	HR-INT2	HR-INT3	HR-INT4	HR-Post	HR-5Post
2	55	152				161	93	58	159				165	100
1	68	161	167	170		175	89	63	164	170			173	99
2	64	171	179	184		185	99	65	174	181	186		182	125
2	68	165	180			180	98	73	165	178			178	121
1	61	169	181			181	94	64	172				175	119
1	68	182	191			196	102	56	178	188			190	126
1	60	174	180			181	89	60	175				178	93
1	73	195				200	104	60	190	197			197	119
2	50	160	176			172	109	48	166				176	102
2	71	161	170	174	176	176	100	74	160	167	169		172	115
2	57	170	194	195		195	94	60	179	190			190	117
2	63	195				185	105	51					181	112
1	70	167	174			174	98	65	164	172			172	103
2	71	175	184	191	193	193	119	75	178	191	194	195	195	123
1	70	179	187			189	103	60	174	182			185	105
1	60	176	184	187		187	98	64	178	184			188	122
